# Supplementary material for: Ambipolar transport in narrow bandgap semiconductor InSb nanowires
Source: Royal Society of Chemistry journal article supplement (doi:10.1039/d0nr00775g), 2020-01-01
Supplement: d0nr00775g1.pdf [file d0nr00775g1.pdf]

## Supplementary Materials for Ambipolar Transport in Narrow Bandgap Semiconductor InSb Nanowires

B. Dalelkhan<sup>1</sup>, D. Göransson<sup>1</sup>, C. Thelander<sup>1</sup>, K. Li<sup>2</sup>, Y. J. Xing<sup>2</sup>, V. F. Maisi<sup>1</sup>, and H. Q. Xu<sup>1,2,3,\*</sup>

<sup>1</sup>NanoLund and Division of Solid State Physics, Lund University, Box 118, S-22100 Lund, Sweden

<sup>2</sup>Beijing Key Laboratory of Quantum Devices, Key Laboratory for the Physics and Chemistry of Nanodevices, and Department of Electronics, Peking University, Beijing 100871, China

<sup>3</sup>Beijing Academy of Quantum Information Sciences, Beijing 100193, China

\*Corresponding author. Email: [hqxu@pku.edu.cn](mailto:hqxu@pku.edu.cn)

(March 22, 2020)

In the main article, we showed the measured ambipolar transport characteristics of an InSb NWFET with a channel length of 1  $\mu\text{m}$  at source-drain bias voltage  $V_D=100$  mV and of an InSb NWFET with a channel length of 260 nm at  $V_D=50$  mV at different temperatures. Here, we provide in Figure S1 the measurements for the two devices at several lower source-drain bias voltages at a low temperature of  $T=4$  K. Excellent ambipolar transport characteristics with three distinct transport regions as defined in Figure 2(d) of the main article can be clearly observed in all these measurements.

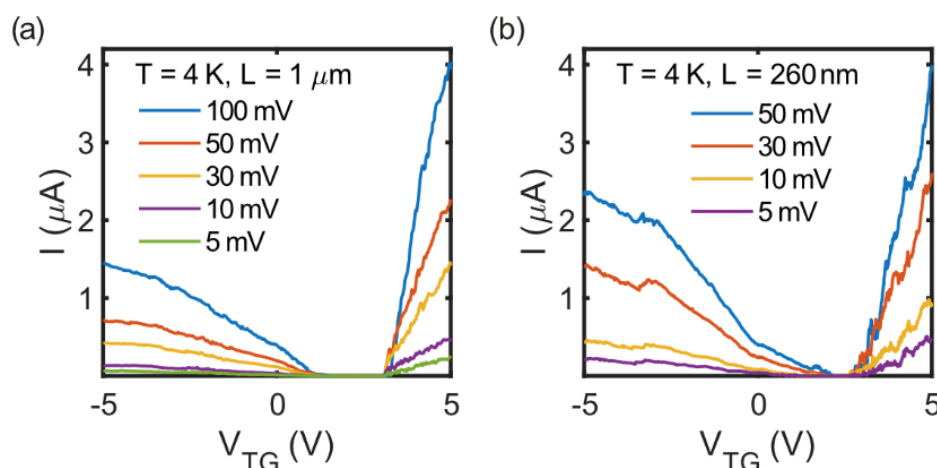

Figure S1. (a) Current  $I$  measured as a function of top-gate voltage  $V_{TG}$  for the InSb NWFET with a channel length of  $L=1 \mu\text{m}$  at different source-drain bias voltages and at a temperature of  $T=4$  K. (b) the same as (a) but for the InSb NWFET with a channel length of  $L=260$  nm. Clear ambipolar transport characteristics can be seen in the measurements of the two devices at all the considered source-drain bias voltages.
